# Supplementary material for: Persistent mosquito fogging can be detrimental to non-target invertebrates in an urban tropical forest
Source: PubMed Central journal article supplement (PMC7533057; doi:10.7717/peerj.10033), 2020-10-01

### Psocoptera

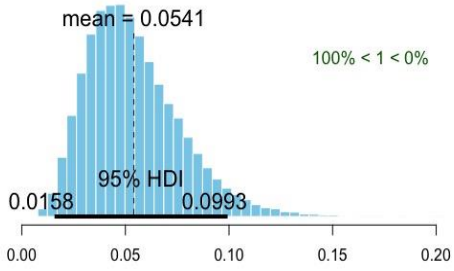

### Araneae

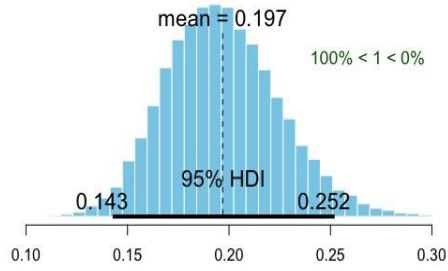

### Thysanoptera

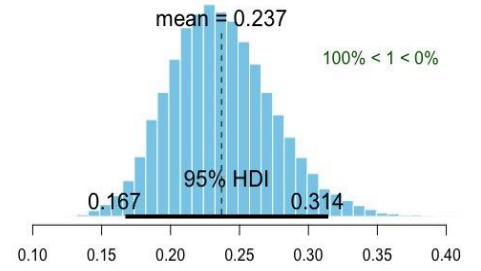

### Blattodea

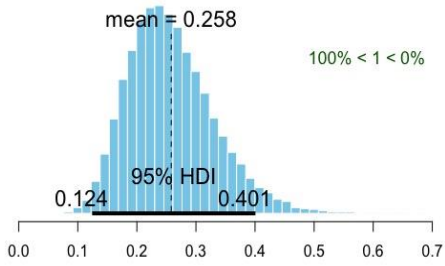

### Acari

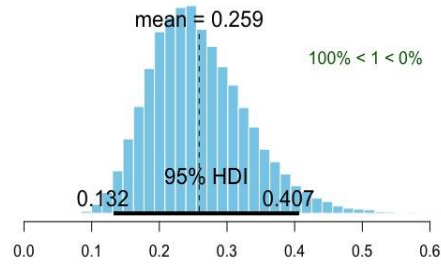

### Collembola

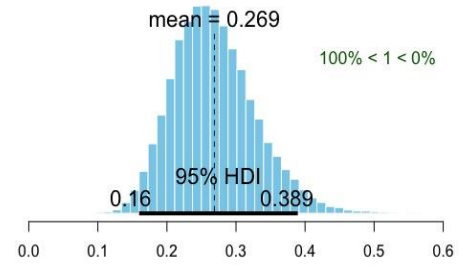

### Hemiptera

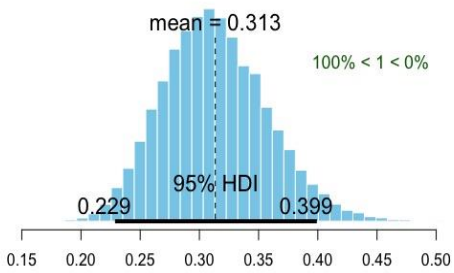

### Hymenoptera

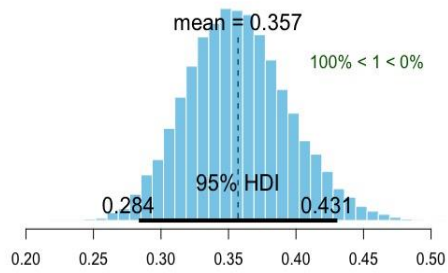

### Coleoptera

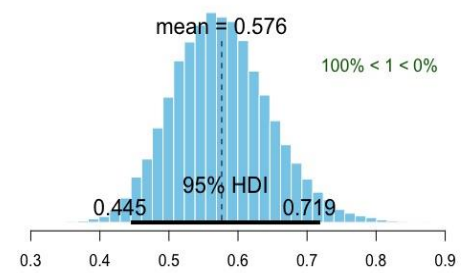

Supplement: peerj-08-10033-s002.pdf [file peerj-08-10033-s002.pdf]
