# Supplementary material for: Persistent mosquito fogging can be detrimental to non-target invertebrates in an urban tropical forest
Source: PeerJ. 2020 Oct 1;8:e10033. doi: 10.7717/peerj.10033 (PMC7533057; doi:10.7717/peerj.10033)
Supplement: Supplemental Information 3 — 19 invertebrate taxa were collected from fogging experiments at KDCF. At each site, invertebrate taxa were sorted to alive 3-hr post-fogging or dead 3-hr post-fogging. Each data point corresponds to the number of individuals identified to the respective taxa. [file peerj-08-10033-s003.xlsx]

## Sheet: Hymenoptera
		Hymenoptera
		Dead	Alive
2019-08-06	Site 1	5	0
2019-08-08	Site 2	17	14
2019-08-13	Site 3	6	19
2019-08-15	Site 4	10	3
2019-08-20	Site 5	9	5
2019-08-22	Site 6	47	23
2019-08-29	Site 7	18	5
2019-09-03	Site 8	20	13
2019-09-05	Site 9	53	22
2019-09-10	Site 10	32	16

## Sheet: Araneae
		Araneae
		Dead	Alive
2019-08-06	Site 1	3	1
2019-08-08	Site 2	5	9
2019-08-13	Site 3	20	6
2019-08-15	Site 4	17	2
2019-08-20	Site 5	32	4
2019-08-22	Site 6	22	5
2019-08-29	Site 7	38	0
2019-09-03	Site 8	19	17
2019-09-05	Site 9	21	0
2019-09-10	Site 10	61	14

## Sheet: Hemiptera
		Hemiptera
		Dead	Alive
2019-08-06	Site 1	9	6
2019-08-08	Site 2	6	4
2019-08-13	Site 3	4	3
2019-08-15	Site 4	6	4
2019-08-20	Site 5	26	8
2019-08-22	Site 6	32	15
2019-08-29	Site 7	16	1
2019-09-03	Site 8	14	10
2019-09-05	Site 9	2	0
2019-09-10	Site 10	29	14

## Sheet: Thysanoptera
		Thysanoptera
		Dead	Alive
2019-08-06	Site 1	0	0
2019-08-08	Site 2	1	0
2019-08-13	Site 3	0	1
2019-08-15	Site 4	1	0
2019-08-20	Site 5	4	0
2019-08-22	Site 6	18	1
2019-08-29	Site 7	16	1
2019-09-03	Site 8	32	8
2019-09-05	Site 9	3	1
2019-09-10	Site 10	84	37

## Sheet: Coleoptera
		Coleoptera
		Dead	Alive
2019-08-06	Site 1	4	2
2019-08-08	Site 2	14	8
2019-08-13	Site 3	16	19
2019-08-15	Site 4	0	3
2019-08-20	Site 5	3	2
2019-08-22	Site 6	14	21
2019-08-29	Site 7	12	11
2019-09-03	Site 8	0	9
2019-09-05	Site 9	6	0
2019-09-10	Site 10	10	31

## Sheet: Diptera
		Diptera
		Dead	Alive
2019-08-06	Site 1	9	0
2019-08-08	Site 2	8	0
2019-08-13	Site 3	20	2
2019-08-15	Site 4	2	0
2019-08-20	Site 5	10	2
2019-08-22	Site 6	16	1
2019-08-29	Site 7	23	5
2019-09-03	Site 8	16	8
2019-09-05	Site 9	7	0
2019-09-10	Site 10	37	0

## Sheet: Collembola
		Collembola
		Dead	Alive
2019-08-06	Site 1	2	1
2019-08-08	Site 2	3	0
2019-08-13	Site 3	3	0
2019-08-15	Site 4	5	0
2019-08-20	Site 5	20	0
2019-08-22	Site 6	22	0
2019-08-29	Site 7	15	0
2019-09-03	Site 8	17	0
2019-09-05	Site 9	7	0
2019-09-10	Site 10	21	2

## Sheet: Psocoptera
		Psocoptera
		Dead	Alive
2019-08-06	Site 1	2	1
2019-08-08	Site 2	3	0
2019-08-13	Site 3	5	0
2019-08-15	Site 4	8	1
2019-08-20	Site 5	15	1
2019-08-22	Site 6	13	0
2019-08-29	Site 7	29	0
2019-09-03	Site 8	10	2
2019-09-05	Site 9	5	0
2019-09-10	Site 10	16	1

## Sheet: Acari
		Acari
		Dead	Alive
2019-08-06	Site 1	0	2
2019-08-08	Site 2	0	3
2019-08-13	Site 3	0	1
2019-08-15	Site 4	1	0
2019-08-20	Site 5	0	0
2019-08-22	Site 6	11	4
2019-08-29	Site 7	11	1
2019-09-03	Site 8	2	2
2019-09-05	Site 9	3	0
2019-09-10	Site 10	19	3

## Sheet: Blattodea
		Blattodea
		Dead	Alive
2019-08-06	Site 1	0	1
2019-08-08	Site 2	1	2
2019-08-13	Site 3	7	0
2019-08-15	Site 4	0	0
2019-08-20	Site 5	0	0
2019-08-22	Site 6	8	6
2019-08-29	Site 7	9	1
2019-09-03	Site 8	2	1
2019-09-05	Site 9	3	0
2019-09-10	Site 10	8	2

[truncated: 10 more sheets: Orthoptera, Lepidoptera, Pseudoscorpiones, Archaeognatha, Unknown, Neuroptera, Opiliones, Phasmotodea, Diplopoda, Mantodea]
